# Supplementary material
Source: Elsevier journal article supplement (https://www.sciencedirect.com/science/article/pii/S0213911116302126)
Supplement: mmc1 [file S0213911116302126:mmc1.docx]

**Tabla I**

Características de los estudios incluidos en la revisión sistemática

| **Autores y año** | **Tipo de estudio** | **Muestra** | **Intervenciones**  **no farmacológicas** | **Instrumentos** | **Resultados** | **Riesgo de sesgo/**  **limitaciones** |
| --- | --- | --- | --- | --- | --- | --- |
| Kurz et al., 201054 | - Diseño: ECCA.  - Cegamiento: sí.  - Duración: 15 meses. | - Muestra: 292 díadas paciente EA-cuidador familiar.  - País: Austria, Suiza y Alemania. | - Intervención: educativa grupal.  - Sesiones: 7 sesiones (+ 6 sesiones complementarias).  - Difusión: terapeutas (psicólogos y trabajadores sociales). | MADRS; SF-36; tiempo como cuidador y utilización de los servicios de salud. | - MADRS: leve ↓ en el GI.  - SF-36:  *Roles sociales: mejoría en ambos grupos.  *Roles emocionales: mejoría en el GI.  *Salud: deterioro del valor inicial en ambos grupos.  - Tiempo dedicado: ↑en el GC.  - Asistencia sanitaria: ↑de 1,2 horas en el GI y 2,4 horas en el GC. | - Riesgo de sesgo de desgaste, ya que en el estudio no especifican las pérdidas.  - Desigualdad en el tiempo de contacto entre el GI y el GC |
| Chien et al., 201055 | - Diseño: ECCA.  - Cegamiento: simple.  - Duración: 2 años. | - Muestra: 92 cuidadores familiares de Alzheimer.  - País: Hong Kong. | - Intervención: multicomponente individual y grupal.  - Sesiones: 10 sesiones de 2 horas.  - Difusión: multidisciplinaria. | FCBI; WHOQoL-BREF; SSQ6. | - FCBI: diferencias significativas entre el GI y el GC (p <0,001).  - WHOQoL-BREF: diferencias significativas entre el GI y el GC (p <0,001).  - FSSI: la utilización de servicios sanitarios ↓ a los 18 meses en el GI. | -Tamaño de la muestra pequeña.  - Riesgo de sesgo de realización, ya que la opinión del investigador principal podría estar sesgada a favor de la intervención. |
| Duncan et al., 201156 | - Diseño: ECCA.  - Cegamiento: Sí.  - Duración: 3 meses. | - Muestra: 53 cuidadores familiares de Alzheimer.  - País: EE.UU. | - Intervención: psicosocial individual (telefónica)  - Sesiones: 9 llamadas de 60 min.  - Difusión: terapeuta ocupacional (maestría). | ZBI; Nursing Home Hassles Scale; Ohio Department of Aging Family Satisfaction Instrument; Social Support; SF-36. | - El GI mostró una mayor reducción de los sentimientos de culpa y menos preocupaciones.  - No hubo mayor utilización de los recursos en el GI, ni mejora en la calidad de vida. | - El seguimiento en el GC no fue el mismo que en el GI.  - Riesgo de sesgo de realización, ya que no hay cegamiento en los participantes. |

(Continuación.)

| **Autores y año** | **Tipo de estudio** | **Muestra** | **Intervenciones**  **no farmacológicas** | **Instrumentos** | **Resultados** | **Riesgo de sesgo/**  **limitaciones** |
| --- | --- | --- | --- | --- | --- | --- |
| Waldorff et al., 201257 | - Diseño: ECCA.  - Cegamiento: simple.  - Duración: 12 meses. | - Muestra: 330 díadas paciente con EA- cuidador familiar.  - País: Dinamarca. | -Intervención: psicosocial individual a cada díada.  - Sesiones: 7 sesiones de 2 horas.  -Difusión: multidisciplinaria. | GDS; EQ-VAS; datos demográficos. | - 6 y 12 meses:  GDS: sin diferencias significativas entre los grupos (p = 0,5212).  EQ-VAS: sin diferencias significativas entre los grupos (p = 0,5083). | - La atención recibida en el GC fue de mayor nivel que la atención habitualmente recibida por los cuidadores en Dinamarca.  - Riesgo de sesgo de realización, ya que no están cegados los participantes. |
| Wang et al., 201258 | - Diseño: ECCA.  - Cegamiento: simple.  - Duración: 24 semanas. | - Muestra: 72 cuidadores familiares de Alzheimer.  - País: China. | - Intervención: GAM.  - Sesiones: 12 sesiones de 1,5 horas.  - Difusión: enfermera de salud mental. | NPI-D; WHOQoL-BREF; FSSI; datos demográficos. | - NPI-D: el GI tuvo una reducción significativamente mayor en las puntuaciones totales (pretest y postest de diferencias de medias = −9,37) que el GC.  - WHOQoL-BREF: mejor CV percibida en general por el GI (p = 0,001).  - FSSI: el GI obtuvo una puntuación ligeramente más alta que el GC. | - Tamaño de la muestra relativamente pequeño.  - Riesgo de sesgo de realización, ya que no están cegados los participantes. |
| Kajiyama et al., 201359 | - Diseño: ECCA.  - Cegamiento: ¿?  - Duración: 7 meses. | - Muestra: 103 cuidadores familiares de Alzheimer.  - País: EE.UU. | - Intervención: psicoeducativa individual.  -Sesiones: ¿?  - Difusión: audiovisual y *online*. | PSS; RMBPC; CES-D; PQoL. | - PSS: ↓en la puntuación postest en el GI  - RMBPC y CES-D: no hubo diferencias significativas en ambos grupos (p = 0,001).  - PQoL: la diferencia entre el pretest y el post-test no fue significativa en ambos grupos (p = 0,340). | - Muestra selectiva en el GC.  - Tasas de abandono muy altas.  - No se obtuvo el seguimiento permanente en el GC.  - Riesgo de sesgo de realización. No están cegados los participantes. |

(Continuación.)

| **Autores y año** | **Tipo de estudio** | **Muestra** | **Intervenciones**  **no farmacológicas** | **Instrumentos** | **Resultados** | **Riesgo de sesgo/**  **limitaciones** |
| --- | --- | --- | --- | --- | --- | --- |
| Knapp et al., 201360 | - Diseño: ECCA.  - Cegamiento: simple.  - Duración: marzo 2010- febrero 2012. | - Muestra: 260 cuidadores familiares de Alzheimer.  - País: Reino Unido. | - Intervención: psicoterapéutica individual.  - Sesiones: 8 sesiones.  - Difusión: psicólogos. | HADS-T; ZBI; HSQ; The brief COPE; costes y rentabilidad. | - No hubo diferencia en el coste entre la intervención START y el tratamiento habitual.  - 8 meses: intervención START más rentable en función de HADS y en AVAC. | - Algunos cuidadores recibieron menos sesiones de la intervención.  - Riesgo de sesgo de realización, ya que no hay cegamiento de los participantes. |
| Livingston et al., 201361 | - Diseño: ECCA.  - Cegamiento: simple.  - Duración: marzo 2010- febrero 2012. | - Muestra: 260 cuidadores.  - País: Reino Unido. | - Intervención: psicoterapéutica individual.  - Sesiones: 8 sesiones  - Difusión: psicólogos. | HADS; ZBI; HSQ; The brief COPE. | - HADS: mostró una diferencia media de −1,80 puntos a favor de GI.  - COPE: mostró unos resultados similares.  - HSQ: no hubo diferencias en las puntuaciones entre el GI y el GC. | - Riesgo de sesgo de realización, ya que no hubo ciego en los participantes.  - Dificultad para acercar la terapia en personas que no hablan inglés. |
| Phung et al., 201362 | - Diseño: ECCA.  - Cegamiento: doble.  - Duración: 12 meses. | - Muestra: 330 díadas paciente con EA- cuidador familiar.  - País: Dinamarca. | - Intervención: psicosocial individual a cada díada.  - Sesiones: 7 sesiones de 2 horas.  - Difusión: multidisciplinaria. | GDS; EQ-VAS; datos demográficos. | - 36 meses: no se encontraron efectos del programa en los síntomas depresivos ni en la CV percibida. | - El GC recibió una intervención mejor que la realizada en la práctica habitual en Dinamarca.  - Efecto suelo: altas puntuaciones de CV en los participantes al inicio del estudio. |

(Continuación.)

| **Autores y año** | **Tipo de estudio** | **Muestra** | **Intervenciones**  **no farmacológicas** | | **Instrumentos** | | **Resultados** | **Riesgo de sesgo/**  **limitaciones** |
| --- | --- | --- | --- | --- | --- | --- | --- | --- |
| Tremont et al., 201363 | - Diseño: ECCA.  - Cegamiento: simple.  - Duración: 6 meses. | - Muestra: 250 cuidadores.  - País: EE.UU. | - Intervención: psicosocial individual (telefónica).  - Sesiones: 16 sesiones de 30-60 minutos.  - Difusión: multidisciplinaria. | | ZBI; Center for Epidemiology Studies Depression Scale; Revised Memory and Behavior Problem Checklist; Family Assessment Device; SEQ; PAC; EuroQoL-5D. | | - No se encontró diferencia significativa en ninguna de las medidas entre el GI y el GC (p = 0,28).  - Todas las variables de resultado se correlacionaron con los síntomas depresivos y la sobrecarga. | - Muestra principalmente caucásica.  - Corto periodo de seguimiento.  - Riesgo de sesgo de realización, ya que no hay cegamiento de los participantes. |
| Livingston et al., 201464 | - Diseño: ECCA.  - Cegamiento: simple.  - Duración: marzo 2010- febrero 2012. | - Muestra: 260 cuidadores familiares de Alzheimer.  - País: Reino Unido. | - Intervención: psicoterapéutica individual.  - Sesiones: 8 sesiones.  - Difusión: psicólogos. | HADS-T; ZBI; HSQ; The brief COPE. | | Corto plazo:  - HADS-T: puntuaciones inferiores en el GI.  - HSQ: puntuaciones más altas en el GI.  Largo plazo:  - HADS-T: puntuaciones inferiores en el GI.  - HSQ: puntuaciones superiores en el GI. | | - Riesgo de sesgo de realización, ya que no hubo ciego en los participantes.  - Dificultad para acercar la terapia en personas que no hablan inglés. |
| Martín-Carrasco et al., 201465 | - Diseño: ECCA.  - Cegamiento: simple.  - Duración: 4 meses. | - Muestra: 238 cuidadores familiares de Alzheimer.  - País: España y Portugal. | - Intervención: psicoeducativa grupal.  - Sesiones: 7 sesiones de 90-120 minutos.  - Difusión: médicos. | ZBI; GHQ-28; QoL: Short-Form Health Survey 12 (SF-12). | | - ZBI, GHQ-28, SF-12: no mostró diferencias significativas entre los grupos (p >0,05).  - Las estimaciones de ansiedad e insomnio mejoraron en el GI. | | - Riesgo de sesgo de realización, ya que no hubo ciego en los participantes. |

(Continuación.)

| **Autores y año** | **Tipo de estudio** | **Muestra** | **Intervenciones**  **no farmacológicas** | | **Instrumentos** | | **Resultados** | **Riesgo de sesgo/**  **limitaciones** |
| --- | --- | --- | --- | --- | --- | --- | --- | --- |
| Tanner et al., 201566 | - Diseño: ECCA.  - Cegamiento: simple.  - Duración: 18 meses. | - Muestra: 289 díadas de paciente con Alzheimer y cuidador.  - País: EE.UU. | - Intervención: multicomponente individual.  - Sesiones: ¿?  - Difusión: multidisciplinaria. | ZBI; GDS; Quality of Life (QoL): SF-12 physical y SF-12 mental. | | - El 96% de los cuidadores tenían necesidades insatisfechas al inicio. Después de la intervención no hubo diferencias entre ambos grupos en las necesidades insatisfechas y en la CV (p = 0,945).  - Las puntuaciones disminuyeron levemente en el GI. | | - El GC no recibió la atención habitual.  - Riesgo de sesgo de realización, ya que no hubo ciego en los participantes.  - Muestra urbana y diversa, poco generalizable. |
| EA: enfermedad de Alzheimer; ECCA: ensayo clínico controlado y aleatorizado; ¿?: no consta en el artículo; GI: grupo de intervención; GC: grupo de control; ↑: aumento; ↓: reducción; NPI: *Neuropsychiatric Inventory Questionnaire;* AVD: actividades de la vida diaria; MADRS: *Montgomery-Asberg Depression Rating Scale;* SF-36: *Short Form Health Survey (SF-36);* FCBI: *Family Caregiving Burden Inventory;* WHOQoL-BREF: *World Health Organisation Quality of Life Measure-Brief;* SSQ6: *Six-item Social Support Questionnaire;* FSSI: *Family Support Services Index;* ZBI: *Zarit Burden Interview;* EQ-VAS: *European Quality of Life Visual Analogue Scale;* GDS: *Geriatric Depression Scale;* GAM: grupo de apoyo mutuo; PSS: *Perceived Stress Scale;* RMBPC: *Revised Memory and Behavior Problems Checklist;* CES-D: *Center for Epidemiological Studies Depression scale;* PQoL: *Perceived Quality of Life;* QoL-AD: *Quality of life-Alzheimer´s disease;* HADS: *Hospital Anxiety and Depression Scale;* HSQ: *Health Status Questionnaire;* CV: calidad de vida; SEQ: *Self-Efficacy Questionnaire;* PAC: *Positive Aspects of Caregiving;* GHQ-28: *General Health Questionnaire-28 items;* AVAC: años de vida ajustados por calidad. | | | | | | | | |

Fuente: elaboración propia, basada en el Manual Cochrane43.

**Tabla II**

Tipos de intervenciones no farmacológicas encontradas, características y resultados obtenidos para la calidad de vida

| **Tipo de intervención** | **Autores**  **y año** | **Características de la intervención e instrumento utilizado para la calidad de vida** | **Resultados de la intervención para la calidad de vida** |
| --- | --- | --- | --- |
| Psicosocial | Duncan et al., 201156 | Intervención telefónica destinada a ayudar a los/las cuidadores/as familiares de pacientes con Alzheimer a adaptarse a las nuevas situaciones, después del ingreso del familiar enfermo en una residencia de mayores, a través de apoyo emocional y la enseñanza de estrategias. De esta forma se pretendía mejorar el estado de ánimo del cuidador y, por ende, su calidad de vida. Cuestionario de salud SF-36. | Tras la intervención: no hubo mejoras en los resultados entre el pretest y el postest. |
| Tremont et al., 201363 | Realizaron la misma intervención que Duncan et al.54, con algunas diferencias (tamaño muestral mayor, aumento del número de sesiones telefónicas y otro instrumento para la calidad de vida). EuroQoL-5D. | Tras la intervención: no se encontraron diferencias significativas (p = 0,28) entre el pretest y el postest. |
| Waldorff et al., 201257 | Programa DAISY, cuyo objetivo fue reducir los síntomas depresivos, mejorar la calidad de vida y evitar la pérdida de la red social del cuidador familiar de Alzheimer. EuroQol-5D (EVA). | 6 y 12 después: no se encontraron diferencias significativas (p = 0,5083) entre el pretest y el postest. |
| Phung et al., 201362 | 36 meses tras la intervención: no se encontraron efectos del programa en la CV percibida. |
| Psicoterapéutica | Livingston et al., 201361 | Programa START, cuyo objetivo fue enseñar estrategias individuales a los cuidadores familiares de Alzheimer para poder hacer frente a los cuidados, mejorando así los niveles de ansiedad y depresión y su calidad de vida.  Pretest y postest. *Health Status Questionnaire* (HSQ). | Tras la intervención: no hubo diferencias en las puntuaciones entre el grupo de intervención y el grupo de control. |
| Knapp et al., 201360 | 8 meses después: se encontró una leve mejoría en el grupo de intervención. |
| Livingston et al., 201464 | 12 y 24 meses después: se obtuvieron puntuaciones mayores en el grupo de intervención. |

(Continuación.)

| **Tipo de intervención** | **Autores** | **Características de la intervención e instrumento utilizado para la calidad de vida** | **Resultados de la intervención para la calidad de vida** |
| --- | --- | --- | --- |
| Psicoeducativa | Kajiyama et al., 201359 | Programa iCare (Internet), cuyo objetivo fue enseñar habilidades de afrontamiento para manejar el estrés sufrido por los/las cuidadores/as familiares de pacientes con Alzheimer y, por ende, su calidad de vida. Pretest y postest. *Perceived Quality of Life* (PQoL). | 7 meses después: no se encontraron diferencias significativas (p = 0,340) entre el pretest y el postest. |
| Martín-Carrasco et al., 201465 | Programa EDUCA-II, cuyo objetivo fue reducir la carga experimentada por los/las cuidadores/as familiares de pacientes con demencia, y por consiguiente mejorar el malestar psicológico y la calidad de vida de estos. Pretest y postest. *Quality of Life SF-12.* | Tras la intervención: no se encontraron diferencias significativas (p >0,05) entre el pretest y el postest. |
| Multicomponente | Chien et al., 201055 | Programa multicomponente que integra componentes educativos, de apoyo y de atención multidisciplinaria para los/las cuidadores/as familiares de pacientes con Alzheimer. Con él se pretendía mejorar la carga, la calidad de vida y el apoyo percibido por los/las cuidadores/as. WHOQoL-BREF. | Tras la intervención: se encontró una mejoría en la calidad de vida tras la intervención (p <0,001). |
| Tanner et al., 201156 | Programa multicomponente que integra componentes educativos, de apoyo y de atención multidisciplinaria para los/las cuidadores/as familiares de pacientes con Alzheimer, cuyo objetivo fue reducir las necesidades insatisfechas de estos/as cuidadores/as, la carga y la depresión, y por ende mejorar su calidad de vida. *Quality of Life SF-12*. | Tras la intervención: no se encontraron diferencias significativas (p = 0,945) entre el pretest y el postest. |
| Formación | Kurz et al., 201054 | Intervención educativa grupal, que se centra en la información sobre la enfermedad de Alzheimer y sus diferentes etapas. Cuestionario de salud SF-36. | Tras la intervención: se encontraron diferencias significativas (p <0,05) entre el pretest y el postest. |
| Comunitaria | Wang et al., 201258 | Programa de apoyo mutuo que incorporaba componentes educativos y de apoyo a la persona cuidadora, con el objetivo de reducir la angustia y mejorar la calidad de vida de los/las cuidadores/as familiares de pacientes con Alzheimer. WHOQoL-BREF. | Tras la intervención: se encontró una mejoría en la calidad de vida tras la intervención (p = 0,001). |
